# Supplementary figures and images for: Mulberry Leaf Extract Alleviates Staphylococcus Aureus-Induced Conjunctivitis in Rabbits via Downregulation of NLRP3 Inflammaome and Upregulation of the Nrf2 System and Suppression of Pro-Inflammatory Cytokines
Source: Research Square preprint supplement (doi:10.21203/rs.3.rs-665199/v1), 2021-07-13

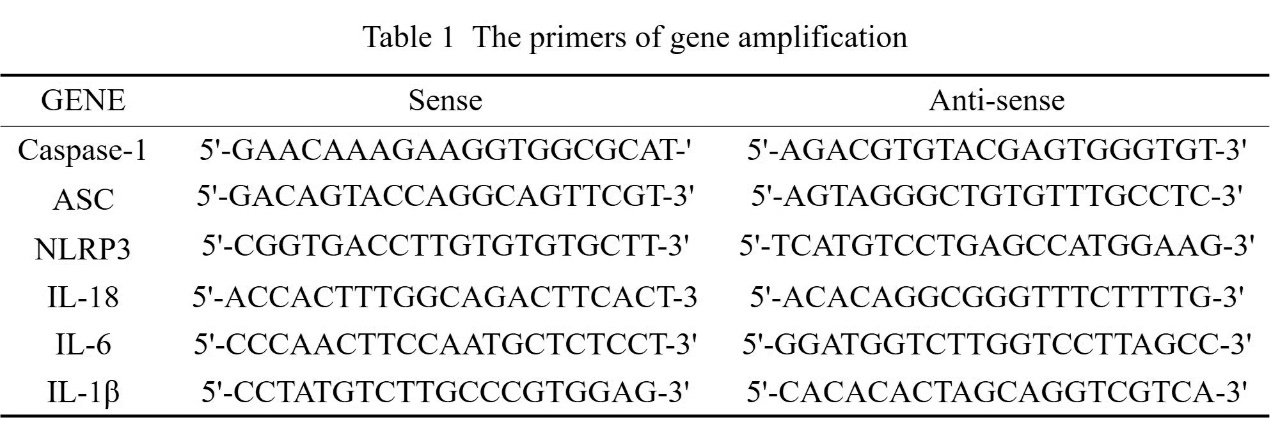


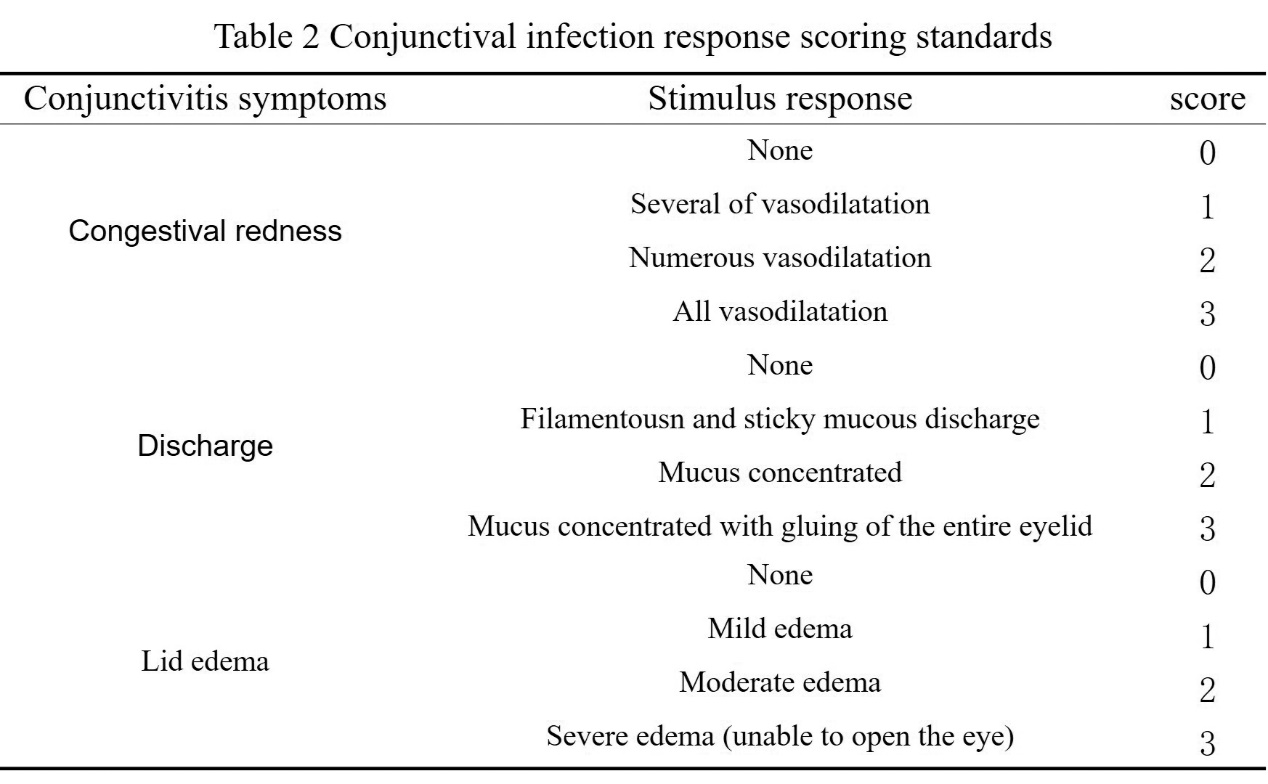

Supplement: Supplementary file 1 [file 44a7e94d0ee978a11d43d456.docx]
